# Supplementary material for: The potential of FCRL genes as targets for cancer treatment: insights from bioinformatics and immunology
Source: publisher site journal article supplement (doi:10.18632/aging.204766), 2023-06-02
Supplement: Supplementary file [file aging-v15i11-204766-supplementary-material-SD1.pdf]

**SUPPLEMENTARY FIGURE**

**A**

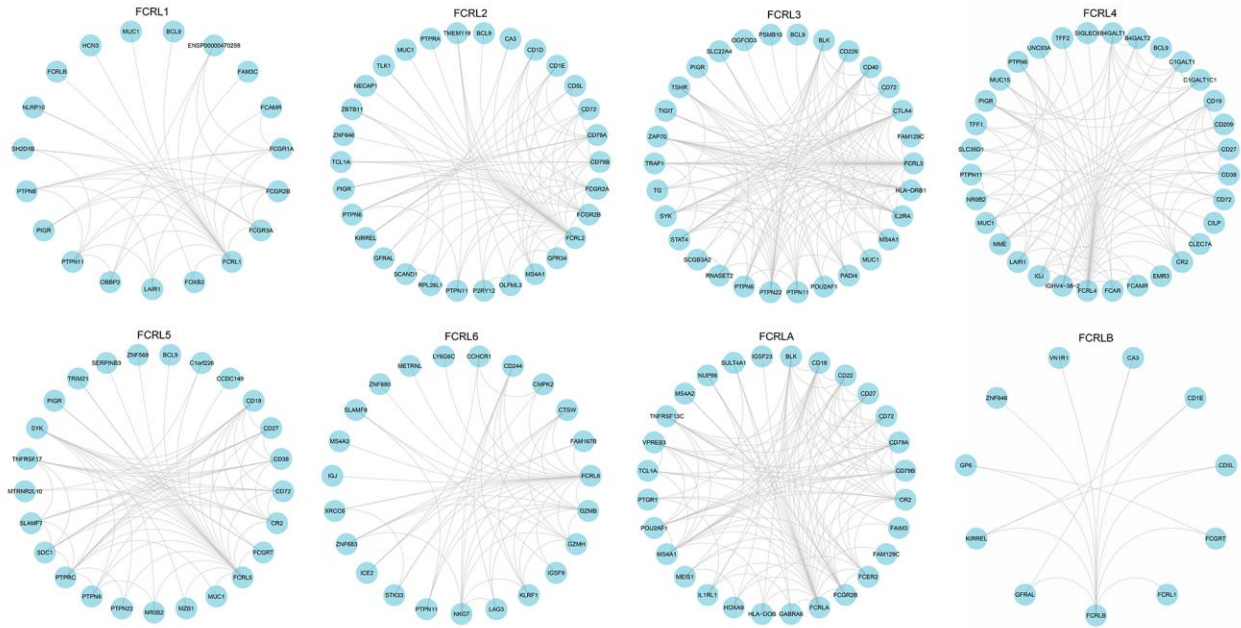

**B**

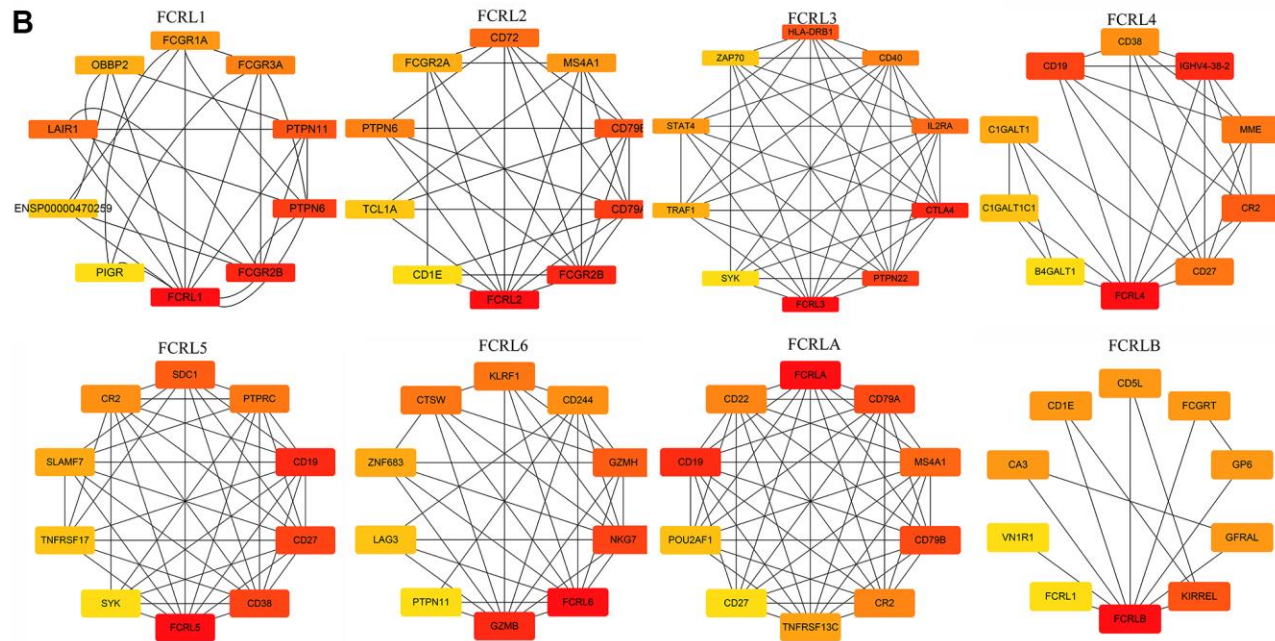

**Supplementary Figure 1. The PPI network of FCRL family and related hub genes. (A) The PPI network of FCRL family. (B) The related hub genes of PPI network of FCRL family.**
